# Supplementary material
Source: publisher figshare collection journal article supplement (https://gsapubs.figshare.com/ndownloader/files/24711650)
Supplement: Supplementary file 1 [file 24711650]

## Sheet: raw data for Paul
SAMPLE 17613a BIOTITE			latitude 37°48'09.4"N longitude 35°00'34.9"E
Run identifier	Sample	Material	CO2 laser power (Watts)	40Ar	40Ar sd	39Ar	39Ar sd	38Ar	38Ar sd	37Ar	37Ar sd	36Ar	36Arsd	Ca/K	%40Ar rad	Age	Age sd	39Ar moles	Irradiation	J	J sd	36Ar/40Ar for isochron	%initial 36Ar/40Ar error for isochron	39Ar/40Ar for isochron	% initial 39Ar/40Ar error for isochron	% initial 39Ar/36Ar error for isochron	Correlation of 40Ar/39Ar for isochron	Correlation of 36Ar/39Ar for isochron
1557-01A	17613A	biotite	0.5	-0.4128	0.293026	-0.103721	0.154205	0.0872356	0.101838	-0.026388	0.104272	-0.0003168	0.0007741	1.51356	77.9243	5.70223	10.7496	-3.16246e-18	DT-26e	0.0010063	1.4763e-07	0.0007394	264.86	0.251286	164.79	295.297	0.83236	0.11545
1557-01B	17613A	biotite	0.8	14.7338	0.294279	0.648455	0.153332	0.0078136	0.102984	0.292828	0.104272	0.0302726	0.0009122	2.68734	39.1402	16.3079	4.00438	1.97714e-17	DT-26e	0.0010063	1.4763e-07	0.0020384	3.64645	0.0440053	23.7425	23.8533	0.106999	0.0460784
1557-01C	17613A	biotite	1	72.895	0.295941	2.12876	0.160334	0.088917	0.102984	1.13892	0.104846	0.118525	0.0012206	3.18483	51.8384	32.4108	2.454	6.49061e-17	DT-26e	0.0010063	1.4763e-07	0.0016131	1.11706	0.0291963	7.54746	7.60779	0.127429	0.0195499
1557-01D	17613A	biotite	1.2	146.881	0.295941	4.07085	0.155175	0.144107	0.101573	0.558579	0.104272	0.0896122	0.0011084	0.817055	81.8794	53.6037	2.02348	1.2412e-16	DT-26e	0.0010063	1.4763e-07	0.0006069	1.26324	0.0277218	3.8178	4.01095	0.306906	0.0084176
1557-01E	17613A	biotite	1.4	228.42	0.298565	6.82462	0.160335	0.0355075	0.101838	0.125638	0.104555	0.0379289	0.0009249	0.109655	95.055	57.6536	1.33768	2.08083e-16	DT-26e	0.0010063	1.4763e-07	0.0001656	2.45886	0.0298887	2.35304	3.39778	0.721498	0.0029529
1557-01F	17613A	biotite	1.6	232.262	0.297866	6.74484	0.154206	0.0893126	0.102984	0.0775887	0.104846	0.0198485	0.0008772	0.0685392	97.4567	60.7629	1.37047	2.05651e-16	DT-26e	0.0010063	1.4763e-07	8.52e-05	4.45734	0.029051	2.28991	5.00718	0.889328	0.0016114
1557-01G	17613A	biotite	1.8	649.074	0.306111	19.3585	0.162163	0.212155	0.102684	0.275499	0.108214	0.0597484	0.0010388	0.0848189	97.2618	59.0731	0.488619	5.90241e-16	DT-26e	0.0010063	1.4763e-07	9.17e-05	1.75213	0.029836	0.839025	1.94129	0.901799	0.001513
1557-01H	17613A	biotite	2	156.695	0.296554	4.62452	0.154924	0.0683444	0.102984	0.0205787	0.104272	0.0066891	0.0008354	0.0265293	98.7289	60.5719	2.00162	1.41002e-16	DT-26e	0.0010063	1.4763e-07	4.26e-05	12.5905	0.0295245	3.35541	13.0261	0.966258	0.0008479
1557-01I	17613A	biotite	2.2	142.192	0.295941	4.36472	0.155696	0.0904006	0.102393	0.0818226	0.103473	0.0092026	0.0008261	0.111795	98.0826	57.8998	2.03924	1.33081e-16	DT-26e	0.0010063	1.4763e-07	6.42e-05	9.09689	0.0307074	3.57329	9.76792	0.930701	0.0013326
1557-01J	17613A	biotite	2.4	226.177	0.297639	7.04627	0.154925	0.122842	0.102984	0.15695	0.104555	0.0076345	0.0008307	0.132873	99.0096	57.5933	1.2505	2.14841e-16	DT-26e	0.0010063	1.4763e-07	3.32e-05	11.133	0.0311653	2.20267	11.3465	0.980978	0.0007062
1557-01K	17613A	biotite	2.6	92.4887	0.295941	3.09673	0.161411	0.0917853	0.101838	-0.0262896	0.103473	0.0013156	0.0007845	-0.0506579	99.5702	53.9436	2.77928	9.44194e-17	DT-26e	0.0010063	1.4763e-07	1.44e-05	59.2746	0.0334958	5.22206	59.5005	0.996141	0.0003308
1557-01L	17613A	biotite	2.8	69.8752	0.295357	1.99504	0.154678	0.125216	0.102111	-0.0561238	0.104272	0.0017146	0.0007882	-0.167916	99.2525	62.9012	4.80575	6.08289e-17	DT-26e	0.0010063	1.4763e-07	2.5e-05	45.3253	0.0285637	7.7644	45.9788	0.98564	0.0005077
1557-01M	17613A	biotite	3	18.0843	0.291652	0.77443	0.158973	0.010583	0.102984	0.0149663	0.104555	0.0001208	0.0007708	0.115388	99.821	42.4183	8.65118	2.36124e-17	DT-26e	0.0010063	1.4763e-07	5.9962e-06	715.347	0.0428393	20.5915	715.631	0.999586	0.0001766
1557-01N	17613A	biotite	3.5	27.62	0.29176	0.815958	0.154439	-0.0761581	0.102393	-0.047656	0.103997	4.26e-05	0.0007845	-0.348826	99.9011	61.2149	11.4234	2.48786e-17	DT-26e	0.0010063	1.4763e-07	3.31197e-06	862.711	0.029556	18.9554	862.91	0.999759	6.82e-05
1557-01O	17613A	biotite	4	14.1129	0.29411	0.220556	0.153541	-0.0351118	0.102684	0.0482468	0.103473	0.0001178	0.0007881	1.30689	99.8254	113.999	77.0171	6.72477e-18	DT-26e	0.0010063	1.4763e-07	5.84712e-06	960.73	0.0156301	69.6647	963.222	0.997381	6.49e-05
1557-01P	17613A	biotite	4.5	15.4501	0.295357	0.390742	0.153978	0.0790263	0.101838	0.0766041	0.103731	-2.97e-05	0.0007774	1.1716	100.195	71.5349	27.705	1.19138e-17	DT-26e	0.0010063	1.4763e-07	-6.53428e-06	-774.774	0.0252947	39.462	-775.788	0.998705	0.0001195
1557-01Q	17613A	biotite	5	15.8384	0.291986	0.397398	0.153129	0.0421342	0.101573	-0.0320989	0.104555	-0.0001505	0.0007708	-0.482851	100.242	72.1032	27.2916	1.21167e-17	DT-26e	0.0010063	1.4763e-07	-8.10163e-06	-604.526	0.0251032	38.5733	-605.764	0.99797	0.0001458
1557-01R	17613A	biotite	7	27.3458	0.291872	0.956438	0.16178	-0.0191879	0.104268	0.0731579	0.104555	0.0002584	0.0007708	0.457387	99.7796	51.7846	8.66556	2.91619e-17	DT-26e	0.0010063	1.4763e-07	7.38236e-06	384.255	0.0349864	16.95	384.619	0.999028	0.0001749
Plateau age = 58.8 ± 0.8 Ma, steps E-R, MSWD = 1.1, 89.5% of 39Ar. Integrated age = 57.3 ± 1.2 Ma.
SAMPLE 11-TR-01 WHOLE ROCK			latitude 37°47'43.3"N longitude 34°57'56.4"E
857-02A	11-TR-01	whole rock	0.1	0.1675	0.400935	-0.0251348	0.230139	0.0810197	0.148481	0.121759	0.135841	0.0001795	0.00152	-15.2962	77.1296	-0.554558	5.68226	-7.66189e-19	DT-15a	5.93e-05	2.7258e-06	0.000766	1209.31	-0.150856	-941.858	-1495.06	0.777224	0.0503036
857-02B	11-TR-01	whole rock	0.3	-0.0859	0.40025	0.387851	0.229563	0.0732046	0.144959	0.0861966	0.137672	0.000671	0.0015754	0.701931	320.436	-0.0769713	0.17867	1.18229e-17	DT-15a	5.93e-05	2.7258e-06	-0.0073833	-528.091	-4.51485	-469.695	255.487	0.457826	0.875291
857-02C	11-TR-01	whole rock	0.5	0.0142	0.399155	0.0456997	0.229563	0.0682584	0.14661	0.0575301	0.137036	-1.4e-05	0.0015708	3.97706	183.435	0.061884	1.49635	1.39307e-18	DT-15a	5.93e-05	2.7258e-06	-0.0027946	-4856.79	3.21453	2855.6	-3992.54	0.808991	0.569722
857-02D	11-TR-01	whole rock	0.7	225.124	0.411096	-0.0399375	0.231031	0.177373	0.14632	-0.0684647	0.13613	0.728035	0.0044736	5.41724	3.44458	-21.2144	123.72	-1.21742e-18	DT-15a	5.93e-05	2.7258e-06	0.003234	0.641057	-0.0001771	-579.537	-579.537	0.0010164	8.98e-05
857-02E	11-TR-01	whole rock	0.9	4865.93	1.16709	6.99632	0.228731	2.11789	0.148154	0.463097	0.13735	11.3025	0.0287082	0.209222	30.6521	22.9723	0.758046	2.1327e-16	DT-15a	5.93e-05	2.7258e-06	0.0023227	0.255136	0.001438	3.26962	3.27938	0.0771116	0.0006896
857-02F	11-TR-01	whole rock	1.1	4067.28	0.99925	10.2059	0.245649	0.948297	0.146907	0.594215	0.13613	3.52583	0.0110533	0.184079	74.1203	31.7535	0.758592	3.11109e-16	DT-15a	5.93e-05	2.7258e-06	0.0008668	0.314484	0.0025095	2.4072	2.4274	0.128764	0.0007973
857-02G	11-TR-01	whole rock	1.3	4780.65	1.16709	10.4245	0.245649	0.915849	0.147519	0.892011	0.137036	3.78005	0.0123686	0.270608	76.3951	37.6024	0.878014	3.17772e-16	DT-15a	5.93e-05	2.7258e-06	0.0007906	0.328152	0.0021807	2.3568	2.37928	0.137156	0.0007706
857-02H	11-TR-01	whole rock	1.5	2284.44	0.658027	5.31855	0.228195	0.229407	0.146907	0.977026	0.136727	1.12122	0.0055379	0.581099	85.3513	39.3327	1.67029	1.62126e-16	DT-15a	5.93e-05	2.7258e-06	0.0004906	0.494945	0.0023281	4.29148	4.31972	0.114188	0.0003906
857-02I	11-TR-01	whole rock	1.7	2724.91	0.740945	6.65745	0.231959	0.429731	0.14661	0.81537	0.135282	1.19381	0.005365	0.387522	86.9233	38.1809	1.31699	2.0294e-16	DT-15a	5.93e-05	2.7258e-06	0.000438	0.45037	0.0024433	3.48477	3.51353	0.127713	0.0004711
857-02J	11-TR-01	whole rock	1.9	2884.56	0.732462	6.87939	0.22985	0.366221	0.144959	0.20697	0.13613	0.687493	0.0042648	0.095218	92.8852	41.7517	1.37942	2.09706e-16	DT-15a	5.93e-05	2.7258e-06	0.0002383	0.620989	0.0023852	3.34134	3.39834	0.182424	0.0003107
857-02K	11-TR-01	whole rock	2.2	5066.72	1.07336	12.3598	0.230733	0.463959	0.146907	0.665536	0.13613	1.47804	0.0063562	0.170464	91.2921	40.1375	0.741411	3.76765e-16	DT-15a	5.93e-05	2.7258e-06	0.0002917	0.430657	0.0024397	1.86703	1.91581	0.224244	0.0005582
857-02L	11-TR-01	whole rock	2.5	6692.93	1.45331	17.3142	0.227938	0.432699	0.14661	1.00904	0.136425	1.40786	0.0059447	0.18454	93.7215	38.8693	0.506538	5.27793e-16	DT-15a	5.93e-05	2.7258e-06	0.0002103	0.422944	0.0025872	1.31674	1.38264	0.305084	0.0008466
857-02M	11-TR-01	whole rock	3	10979.7	2.2343	29.0138	0.241406	0.949583	0.145485	2.25234	0.135841	2.84389	0.0094821	0.24588	92.2693	37.4777	0.308966	8.84434e-16	DT-15a	5.93e-05	2.7258e-06	0.0002589	0.334149	0.0026427	0.832356	0.896456	0.371357	0.0014889
857-02N	11-TR-01	whole rock	4	10631.4	2.33283	28.1639	0.241405	0.965213	0.14632	4.39248	0.135841	2.73335	0.0094623	0.494108	92.3288	37.4118	0.317772	8.58526e-16	DT-15a	5.93e-05	2.7258e-06	0.0002569	0.347099	0.0026491	0.857567	0.924621	0.37389	0.0016176
857-02O	11-TR-01	whole rock	5	15375.6	3.52166	40.9409	0.245676	1.58508	0.145757	6.67684	0.135559	5.53189	0.0156054	0.516809	89.2634	35.9992	0.214485	1.24801e-15	DT-15a	5.93e-05	2.7258e-06	0.0003596	0.283163	0.0026627	0.600615	0.663224	0.424151	0.0030846
857-02P	11-TR-01	whole rock	6	18203.2	3.7205	47.4859	0.250263	2.02292	0.14721	6.69437	0.135014	7.38423	0.0200558	0.446863	87.893	36.1784	0.189484	1.44752e-15	DT-15a	5.93e-05	2.7258e-06	0.0004055	0.27247	0.0026087	0.5275	0.593008	0.456881	0.0029065
Integrated age = 37 ± 3 Ma. No age plateau.
SAMPLE 21613 WHOLE ROCK			latitude 37°48'29"N longitude 35°00'23"E
1564-01A	21613a	whole rock	1.1	1878.23	0.33121	17.8145	0.165764	1.18065	0.102684	4.75368	0.103733	5.25576	0.0101101	1.42993	16.5111	31.7805	0.425657	5.43144e-16	DT-26e	0.0010063	1.4763e-07	0.0027964	0.193306	0.0094854	0.930935	0.950461	0.201684	0.001728
1564-01B	21613a	whole rock	1.2	1086.46	0.310161	23.3828	0.155187	0.62321	0.102393	5.36445	0.109781	1.74559	0.0044298	1.22975	52.1396	44.077	0.307408	7.12917e-16	DT-26e	0.0010063	1.4763e-07	0.001603	0.255988	0.0215244	0.664455	0.710901	0.355598	0.0047915
1564-01C	21613a	whole rock	1.3	718.213	0.306433	20.7333	0.154933	0.635672	0.102111	5.55941	0.111033	0.700393	0.0027068	1.43774	71.056	44.7762	0.339032	6.32135e-16	DT-26e	0.0010063	1.4763e-07	0.0009695	0.391278	0.02887	0.748698	0.842585	0.458831	0.0062141
1564-01D	21613a	whole rock	1.4	626.649	0.303644	18.7582	0.155973	0.311556	0.101838	6.65845	0.104558	0.51256	0.0022519	1.90385	75.8132	46.0602	0.38491	5.71917e-16	DT-26e	0.0010063	1.4763e-07	0.0008101	0.446501	0.0299336	0.833214	0.942777	0.467995	0.0063112
1564-01E	21613a	whole rock	1.5	708.72	0.310161	20.9389	0.161789	0.34825	0.102684	10.5887	0.10428	0.54997	0.0021867	2.71312	77.1602	47.4856	0.367675	6.38405e-16	DT-26e	0.0010063	1.4763e-07	0.000765	0.405952	0.0295394	0.774326	0.87205	0.460074	0.0060931
1564-01F	21613a	whole rock	1.6	735.35	0.306757	21.3092	0.16179	0.348547	0.102111	14.249	0.103747	0.543813	0.0021831	3.58864	78.3469	49.1445	0.37343	6.49694e-16	DT-26e	0.0010063	1.4763e-07	0.0007253	0.411731	0.0289681	0.760932	0.863125	0.472096	0.0055546
1564-01G	21613a	whole rock	1.7	503.269	0.305164	14.1042	0.153982	0.196527	0.102393	13.7694	0.111476	0.374601	0.0017522	5.24096	78.3791	50.83	0.553326	4.30021e-16	DT-26e	0.0010063	1.4763e-07	0.0007242	0.485125	0.028006	1.09457	1.19411	0.399888	0.0069243
1564-01H	21613a	whole rock	1.8	456.512	0.3011	12.622	0.155178	0.250728	0.102111	17.9969	0.104023	0.370186	0.00175	7.65674	76.6579	50.4203	0.618445	3.8483e-16	DT-26e	0.0010063	1.4763e-07	0.0007818	0.495221	0.0276167	1.23306	1.32545	0.366973	0.0071243
1564-01I	21613a	whole rock	1.9	400.813	0.301644	10.9209	0.15398	0.233222	0.102111	21.1602	0.111933	0.344873	0.0018232	10.4079	75.4739	50.4015	0.709996	3.32967e-16	DT-26e	0.0010063	1.4763e-07	0.0008215	0.559389	0.0272005	1.41487	1.51764	0.361896	0.0071562
1564-01J	21613a	whole rock	2	359.772	0.300568	8.81757	0.155434	0.103951	0.102684	23.9761	0.104042	0.41306	0.0019412	14.6105	67.1893	49.9297	0.881172	2.68838e-16	DT-26e	0.0010063	1.4763e-07	0.001099	0.498428	0.0244467	1.76986	1.83484	0.264	0.0079122
1564-01K	21613a	whole rock	2.5	867.188	0.306757	17.3068	0.155439	0.426485	0.102984	79.9023	0.114652	1.44465	0.0041708	24.8146	52.2933	47.8467	0.448136	5.27666e-16	DT-26e	0.0010063	1.4763e-07	0.0015979	0.303133	0.0198665	0.903265	0.951441	0.314254	0.0045701
1564-01L	21613a	whole rock	3	702.928	0.306757	14.4317	0.15421	0.280499	0.102393	148.116	0.118685	1.29099	0.0033999	55.1799	49.8114	44.6117	0.500217	4.40008e-16	DT-26e	0.0010063	1.4763e-07	0.001681	0.291117	0.0203139	1.08123	1.11801	0.254527	0.0060505
1564-01M	21613a	whole rock	3.5	671.246	0.304243	12.4462	0.162923	0.558822	0.102984	222.08	0.123657	1.54858	0.0042564	95.9621	38.4175	38.476	0.555872	3.79472e-16	DT-26e	0.0010063	1.4763e-07	0.0020626	0.310826	0.0181963	1.33514	1.36932	0.222159	0.0049505
1564-01N	21613a	whole rock	4	537.362	0.30335	12.8816	0.155699	0.408385	0.102684	197.646	0.119363	1.13228	0.0033474	82.5424	45.2034	34.9568	0.46022	3.92745e-16	DT-26e	0.0010063	1.4763e-07	0.0018354	0.344194	0.0235886	1.23007	1.2748	0.262726	0.0075271
1564-01O	21613a	whole rock	5	1540.28	0.322025	39.9325	0.162569	1.03338	0.102984	75.9271	0.115084	2.6608	0.0060672	10.232	49.512	34.8961	0.164216	1.2175e-15	DT-26e	0.0010063	1.4763e-07	0.001691	0.233898	0.0258823	0.40847	0.469759	0.493915	0.0045751
1564-01P	21613a	whole rock	6	1551.23	0.322025	41.5851	0.162956	1.14643	0.102393	21.0139	0.104032	2.43766	0.0055501	2.72012	53.3824	36.3175	0.158942	1.26789e-15	DT-26e	0.0010063	1.4763e-07	0.0015614	0.230106	0.026803	0.392623	0.454127	0.502559	0.0047701
1564-01Q	21613a	whole rock	8	983.815	0.310161	25.2889	0.161794	0.706786	0.102984	15.9703	0.104292	1.54589	0.0042542	3.4004	53.4453	37.9088	0.257724	7.71033e-16	DT-26e	0.0010063	1.4763e-07	0.0015593	0.279151	0.0256969	0.640987	0.697696	0.394985	0.0055548
1564-01R	21613a	whole rock	10	554.714	0.300306	12.2576	0.163313	0.482664	0.103609	7.24666	0.104001	1.00846	0.0030872	3.18428	46.0113	37.9619	0.520856	3.73723e-16	DT-26e	0.0010063	1.4763e-07	0.0018083	0.3126	0.0220913	1.33428	1.36824	0.221608	0.0070269
Integrated age = 41.99 ± 0.18 Ma. No age plateau
SAMPLE 21613 PLAGIOCLASE			latitude 37°48'29"N longitude 35°00'23"E
1567-01A	21613a	plagioclase	10	33.9768	0.123939	1.40023	0.128058	0.0150338	0.0907013	0.211006	0.102545	0.0233935	0.0006811	1.19871	79.6454	35.1481	3.19969	4.26976e-17	DT-26e	0.0010036	8.306e-07	0.0006818	3.00289	0.0412222	9.1549	9.61944	0.307505	0.0048403
1567-02A	21613a	plagioclase	10	103.401	0.13285	3.62954	0.126101	0.126996	0.0907013	0.416399	0.0960421	0.0672403	0.0008857	0.912869	80.7192	41.7444	1.44175	1.10676e-16	DT-26e	0.0010036	8.306e-07	0.0006458	1.34205	0.0351128	3.47729	3.72236	0.357177	0.0035373
1567-03A	21613a	plagioclase	10	20.0892	0.124455	0.530825	0.124937	-0.0845651	0.0903609	-0.0316066	0.0963293	0.015955	0.0005713	-0.473925	76.2168	52.1971	12.1322	1.61865e-17	DT-26e	0.0010036	8.306e-07	0.0007966	3.68375	0.0264391	23.5422	23.8104	0.150318	0.0044256
1567-04A	21613a	plagioclase	10	213.215	0.135532	6.85393	0.126726	0.248552	0.0914104	1.10485	0.0960422	0.222212	0.0013969	1.28345	69.0557	39.0285	0.723442	2.08998e-16	DT-26e	0.0010036	8.306e-07	0.0010365	0.637146	0.0321535	1.85052	1.95492	0.322642	0.0034271
1567-05A	21613a	plagioclase	10	47.5213	0.132004	1.08758	0.1261	0.159932	0.0903609	0.156162	0.0963293	0.0398108	0.0007146	1.14356	75.108	59.2913	6.77874	3.31638e-17	DT-26e	0.0010036	8.306e-07	0.0008337	1.84442	0.0228924	11.6005	11.7388	0.153542	0.0036064
1567-06A	21613a	plagioclase	10	49.103	0.132004	1.8482	0.137225	0.0795209	0.089709	0.166304	0.0966258	0.0401207	0.0007468	0.716849	75.7203	36.5696	2.70076	5.63576e-17	DT-26e	0.0010036	8.306e-07	0.0008132	1.90819	0.0376527	7.43074	7.66151	0.244083	0.005097
1567-07A	21613a	plagioclase	10	119.315	0.13285	3.59963	0.136746	0.0113743	0.0914104	0.595503	0.0960421	0.111484	0.001045	1.31835	72.2645	43.465	1.64102	1.09764e-16	DT-26e	0.0010036	8.306e-07	0.000929	0.954138	0.0301764	3.80153	3.91595	0.24031	0.003418
1567-08A	21613a	plagioclase	10	50.3477	0.13159	1.96215	0.127714	0.24509	0.0903609	1.23197	0.0957642	0.0419342	0.0006991	5.00498	75.951	35.4673	2.30005	5.98324e-17	DT-26e	0.0010036	8.306e-07	0.0008055	1.76286	0.0389529	6.52058	6.7437	0.255624	0.0059429
1567-09A	21613a	plagioclase	10	53.9362	0.130388	1.51707	0.126725	0.091093	0.089709	0.198993	0.0969313	0.0341869	0.000698	1.04592	81.2019	52.2576	4.31438	4.62603e-17	DT-26e	0.0010036	8.306e-07	0.0006296	2.09337	0.0281353	8.35852	8.60885	0.239887	0.00334
1567-10A	21613a	plagioclase	10	151.673	0.136473	5.64842	0.125799	0.170911	0.0914104	0.83398	0.101691	0.0936294	0.0008745	1.17768	81.7516	39.8723	0.883706	1.72239e-16	DT-26e	0.0010036	8.306e-07	0.0006112	0.955292	0.0372508	2.2295	2.42183	0.390882	0.0038015
Weighted mean age = 39.6 ± 1.5 Ma (excluding grains 3, 5, 9), MSWD = 2.48
